# Supplementary material for: Regulating anti-thermal quenching to zero thermal quenching for highly efficient blue-emitting Eu2+-doped K-beta-alumina phosphors
Source: Royal Society of Chemistry journal article supplement (doi:10.1039/d3tc00698k), 2023-01-01
Supplement: d3tc00698k1.pdf [file d3tc00698k1.pdf]

## Supporting Information

### **Regulating anti-thermal quenching to zero thermal quenching for highly efficient blue-emitting Eu<sup>2+</sup>-doped K-beta-alumina phosphors**

Yuhang Kuang,<sup>a</sup> Yunjia Li,<sup>a</sup> Borui Chen,<sup>a</sup> Shujuan Zhao,<sup>a</sup> Mengfang Chen,<sup>a</sup> Shixun Lian,<sup>a</sup> Jilin Zhang<sup>\*a</sup>

<sup>a</sup> Key Laboratory of Light Energy Conversion Materials of Hunan Province College, Key Laboratory of Chemical Biology and Traditional Chinese Medicine Research (Ministry of Education of China), Hunan Normal University, Changsha 410081, China

\*Email: chemzhangjl@hunnu.edu.cn

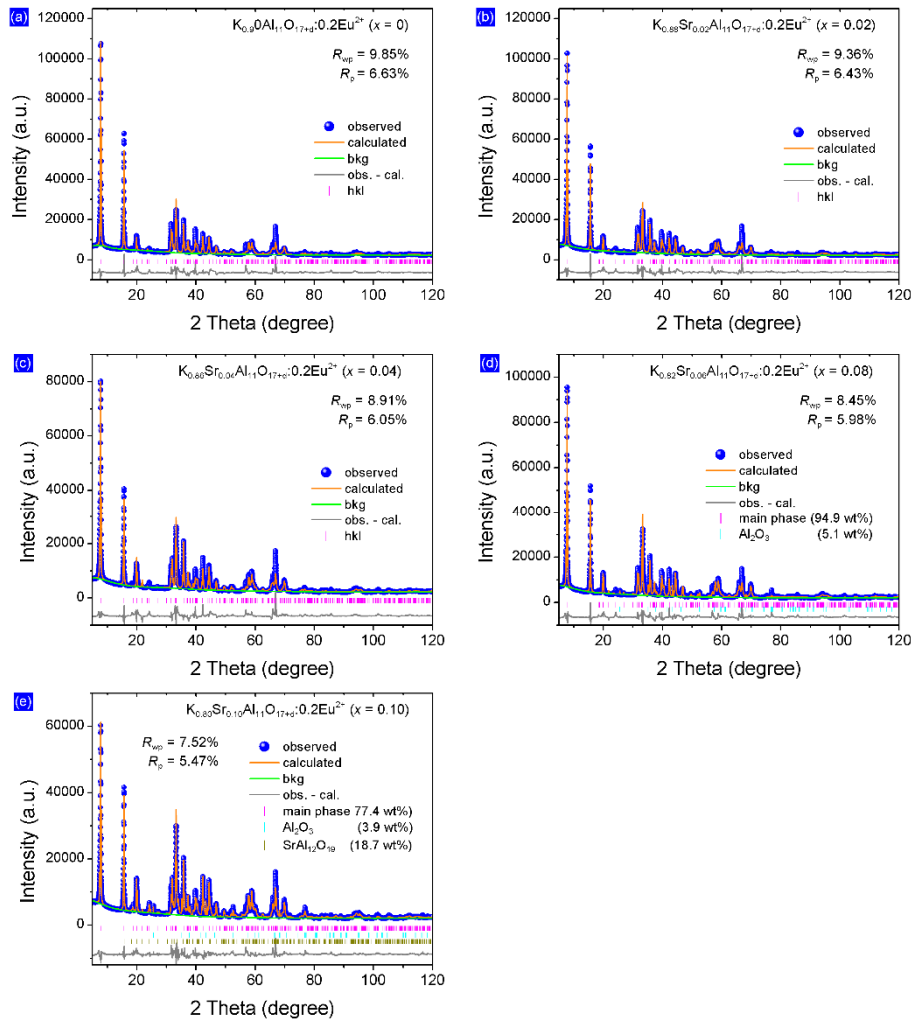

Figure S1. Rietveld refinement results for  $K_{0.90-x}Sr_xAl_{11}O_{17+d}:0.2Eu^{2+}$ . (a)  $x = 0$ , (b)  $x = 0.02$ , (c)  $x = 0.04$ , (d)  $x = 0.08$ , (e)  $x = 0.10$ .

Table S1. Cell parameters of  $K_{0.90-x}Sr_xAl_{11}O_{17+d}:0.2Eu^{2+}$  ( $x = 0.06$ )

| Atom | Wyck. | Site | $x / \text{\AA}$ | $y / \text{\AA}$ | $z / \text{\AA}$ | S.O.F  | $U_{iso} / \text{\AA}^2$ |
|------|-------|------|------------------|------------------|------------------|--------|--------------------------|
| K1   | 6h    | mm2  | 0.66732          | 0.33463          | 1/4              | 0.222  | 0.0098                   |
| Sr1  | 6h    | mm2  | 0.66732          | 0.33463          | 1/4              | 0.01   | 0.0098                   |
| Eu1  | 6h    | mm2  | 0.66732          | 0.33463          | 1/4              | 0.0444 | 0.0098                   |
| K2   | 6h    | mm2  | 0.88396          | 0.76791          | 1/4              | 0.058  | 0.0098                   |
| Sr2  | 6h    | mm2  | 0.88396          | 0.76791          | 1/4              | 0.01   | 0.0098                   |
| Eu2  | 6h    | mm2  | 0.88396          | 0.76791          | 1/4              | 0.0222 | 0.0098                   |
| Al1  | 12k   | m    | 0.83143          | 0.66287          | 0.10856          | 0.9837 | 0.0065                   |
| Al2  | 4f    | 3m   | 1/3              | 2/3              | 0.02840          | 1      | 0.0111                   |
| Al3  | 4f    | 3m   | 1/3              | 2/3              | 0.17066          | 0.9294 | 0.0024                   |
| Al4  | 2a    | -3m  | 0                | 0                | 0                | 1      | 0.0211                   |
| O1   | 12k   | m    | 0.15747          | 0.31495          | 0.05328          | 1      | 0.0064                   |
| O2   | 12k   | m    | 0.50196          | 0.00393          | 0.14264          | 1      | 0.0122                   |
| O3   | 4f    | 3m   | 2/3              | 1/3              | 0.04890          | 0.9354 | 0.0127                   |
| O4   | 4e    | 3m   | 0                | 0                | 0.14287          | 1      | 0.0322                   |
| O5   | 6h    | mm2  | 0.30183          | 0.60366          | 1/4              | 0.333  | 0.0489                   |

Table S2. Cell parameters of  $K_{0.90-x}Sr_xAl_{11}O_{17+d}:0.2Eu^{2+}$

|            | $a / \text{\AA}$ | $c / \text{\AA}$ | $V / \text{\AA}^3$ |
|------------|------------------|------------------|--------------------|
| $x = 0$    | 5.597(1)         | 22.685(1)        | 615.45(4)          |
| $x = 0.02$ | 5.600(1)         | 22.690(1)        | 616.26(4)          |
| $x = 0.04$ | 5.608(1)         | 22.718(1)        | 618.65(4)          |
| $x = 0.06$ | 5.603(1)         | 22.696(1)        | 616.99(3)          |
| $x = 0.08$ | 5.605(1)         | 22.706(1)        | 617.74(3)          |
| $x = 0.10$ | 5.598(1)         | 22.680(1)        | 615.55(4)          |

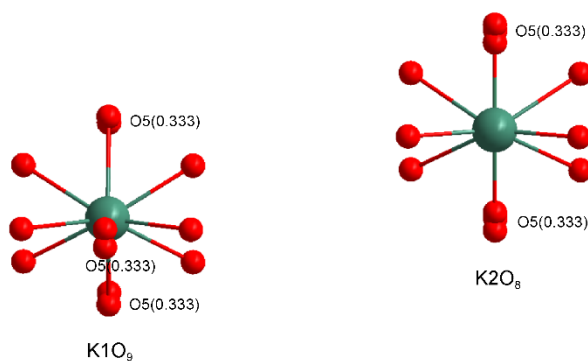

Figure S2. K1O<sub>9</sub> and K2O<sub>8</sub> polyhedrons.

Table S3. K-O bond lengths (Å) for  $\text{K}_{0.90-x}\text{Sr}_x\text{Al}_{11}\text{O}_{17+d}\cdot 0.2\text{Eu}^{2+}$ 

|                 | K1-O2(x6)                    | K1-O5(x3)                                    | <i>D</i> of K1 | K2-O2(x4) | K2-O4(x2) | K2-O5(x2) |
|-----------------|------------------------------|----------------------------------------------|----------------|-----------|-----------|-----------|
| <i>x</i> = 0    | x4: 2.862(1)<br>x2: 3.020(1) | x2: 2.984(1)<br>x1: 3.288(1)                 | 0.03277        | 3.083(1)  | 2.688(1)  | 2.557(1)  |
| <i>x</i> = 0.02 | x4: 2.874(1)<br>x2: 2.919(1) | x2: 3.112(1)<br>x1: 3.196(1)                 | 0.03753        | 3.093(1)  | 2.677(1)  | 2.776(1)  |
| <i>x</i> = 0.04 | x4: 2.946(1)<br>x2: 2.959(1) | x2: 3.125(1)<br>x1: 3.149(1)                 | 0.02696        | 3.140(1)  | 2.642(1)  | 2.660(1)  |
| <i>x</i> = 0.06 | x4: 2.912(1)<br>x2: 2.918(1) | x2: 3.090(1)<br>x1: 3.100(1)                 | 0.02680        | 3.093(1)  | 2.680(1)  | 2.559(1)  |
| <i>x</i> = 0.08 | x4: 2.837(1)<br>x2: 3.008(1) | x1: 3.025(1)<br>x1: 3.047(1)<br>x1: 3.335(1) | 0.04111        | 3.075(1)  | 2.637(1)  | 2.648(1)  |
| <i>x</i> = 0.10 | x4: 2.906(6)<br>x2: 2.971(8) | x1: 3.052(1)<br>x1: 3.040(1)<br>x1: 3.158(1) | 0.2322         | 3.070(7)  | 2.627(10) | 2.546(1)  |

The polyhedral distortion index (*D*) can be calculated by the following equation,<sup>[1]</sup>

$$D = \frac{1}{n} \sum_{i=1}^n \frac{|l_i - l_{av}|}{l_{av}}$$

where  $l_i$  and  $l_{av}$  are the single and average bond length for the central atom and coordinating atom(s), respectively.

Table S4. Thickness (Å) of the spinel blocks and K layers\*

|                 | Spinel blocks | K layers |
|-----------------|---------------|----------|
| <i>x</i> = 0    | 6.4833        | 4.8591   |
| <i>x</i> = 0.02 | 6.4675        | 4.8774   |
| <i>x</i> = 0.04 | 6.4841        | 4.8748   |
| <i>x</i> = 0.06 | 6.4850        | 4.8628   |
| <i>x</i> = 0.08 | 6.5422        | 4.8111   |
| <i>x</i> = 0.10 | 6.6136        | 4.7266   |

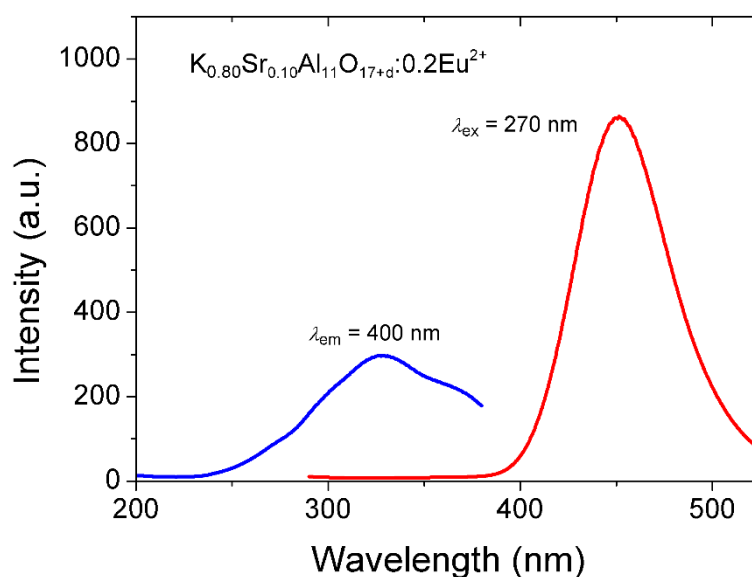

Figure S3. PL ( $\lambda_{\text{ex}} = 270 \text{ nm}$ ) and PLE spectra ( $\lambda_{\text{em}} = 400 \text{ nm}$ ) of  $\text{K}_{0.80}\text{Sr}_{0.10}\text{Al}_{11}\text{O}_{17+d}:\text{0.2Eu}^{2+}$ .

The  $\text{SrAl}_{12}\text{O}_{19}:\text{Eu}^{2+}$  exhibited a PL band at around 400 nm under excitation at 272 nm, according to published literatures.<sup>[2,3]</sup> However,  $\text{K}_{0.80}\text{Sr}_{0.10}\text{Al}_{11}\text{O}_{17+d}:\text{0.2Eu}^{2+}$  has no PL and PLE spectra that are similar to  $\text{SrAl}_{12}\text{O}_{19}:\text{Eu}^{2+}$ . This phenomenon indicates that the formation of a small amount of  $\text{SrAl}_{12}\text{O}_{19}:\text{Eu}^{2+}$  does not influence the PL profile of  $\text{K}_{0.90-x}\text{Sr}_x\text{Al}_{11}\text{O}_{17+d}:\text{0.2Eu}^{2+}$ .

[1] X. Zhang, M.-H. Fang, Y.-T. Tsai, A. Lazarowska, S. Mahlik, T. Lesniewski, M. Grinberg, W. K. Pang, F. Pan, C. Liang, W. Zhou, J. Wang, J.-F. Lee, B.-M. Cheng, T.-L. Hung, Y.-Y. Chen, R.-S. Liu, *Chem. Mater.*, 2017, **29**, 6781-6792

[2] R. Zhong, J. Zhang, X. Zhang, S. Lu and X.-j. Wang, *Nanotechnology*, 2007, **18**, 445707.

[3] R. Zhong, J. Zhang, X. Zhang, S. Lu, X. Ren and X.-j. Wang, *J. Phys. D: Appl. Phys.*, 2018, **41**, 065104.
